# Supplementary material
Source: HighWire-hosted journal article supplement (https://cmaj.ca/highwire/filestream/71803/field_highwire_adjunct_files/2/180839-res-3-at.pdf)
Supplement: 180839-res-3-at.pdf [file 180839-res-3-at.pdf]

**Appendix 3 (as supplied by the authors): Demographic characteristics of patients interviewed (n=27)<sup>1</sup>**

| <b>Demographic characteristic</b>     | <b>Number of participants</b> |
|---------------------------------------|-------------------------------|
| <b>Age</b>                            |                               |
| 18-24                                 | <6                            |
| 25-34                                 | <6                            |
| 35-49                                 | 8                             |
| 50-64                                 | 7                             |
| 65+                                   | <6                            |
| <b>Gender identity</b>                |                               |
| female                                | 18                            |
| male                                  | <6                            |
| other                                 | <6                            |
| <b>Sexual orientation<sup>2</sup></b> |                               |
| Heterosexual                          | 6                             |
| Gay                                   | <6                            |
| Bi-flexible                           | <6                            |
| Queer                                 | <6                            |
| Unknown                               | 17                            |
| <b>Educational attainment</b>         |                               |
| less than high school                 | <6                            |
| completed high school                 | 6                             |
| completed college                     | <6                            |
| completed university                  | 13                            |
| <b>Preferred language</b>             |                               |
| English                               | 20                            |
| other                                 | 7                             |
| <b>Born in Canada</b>                 |                               |
| yes                                   | 15                            |
| no                                    | 12                            |
| <b>Self-rated health</b>              |                               |
| excellent or very good                | 9                             |
| good                                  | 9                             |
| fair or poor                          | 9                             |

<sup>1</sup>Cell sizes less than 6 have been suppressed to reduce the risk of participant re-identification.

<sup>2</sup>Sexual orientation data was not systematically collected during the interviews. We report on the orientation of patients that voluntarily disclosed this information during the interview process.
